# Supplementary material for: Neogene plant macrofossils from West Antarctica reveal persistence of Nothofagaceae forests into the Early Miocene
Source: Research Square preprint supplement (doi:10.21203/rs.3.rs-6148923/v1), 2025-04-26
Supplement: Supplementary file 1 [file 23JB15_UPb.xlsx]

## Sheet: 23JB15
23JB15
	Element content					Ratios									Ages (Ma)
Spot	U (ppm)	Th (ppm)	Pb (ppm)	U/Th		207Pb/235U	± 2SD	206Pb/238U	± 2SD	238U/206Pb	± 2SD	207Pb/206Pb	± 2SD		206Pb/238U	± 2SD	207Pb/206Pb	± 2SD
23JB15 - 23	107.691	98.6007	0.914602	1.13076		0.027581	0.00477429	0.00299505	0.000159506	334.413	19.6524	0.0667737	0.0112276	0	19.2781	1.02507	476.94	392.677
23JB15 - 49	169.63	159.93	1.56398	1.07893		0.0297238	0.00525622	0.00307024	0.000175613	330.889	20.0186	0.0736865	0.0134273	0	19.7612	1.12862	919.045	352.386
23JB15 - 38	370.505	509.109	5.12293	0.738374		0.0203609	0.00264021	0.00313481	0.000157888	321.814	16.9974	0.0476858	0.00604428	0	20.1763	1.01468	-195.123	319.317
23JB15 - 17	210.021	200.212	2.03584	1.09089		0.0168691	0.00266699	0.00315386	0.000156392	314.719	15.7674	0.0386063	0.00593665	0	20.2987	1.005	-368.155	369.205
23JB15 - 56	68.4723	43.4561	0.45943	1.58044		0.0229037	0.00688881	0.0031844	0.000249665	330.331	27.689	0.0603364	0.0196646	0	20.4937	1.60416	1044.49	443.306
23JB15 - 90	574.573	659.901	6.40949	0.872123		0.0210027	0.0024027	0.00319424	0.000144373	314.455	14.2044	0.0479152	0.00494929	0	20.5584	0.9277	-39.1786	263.767
23JB15 - 82	105.879	86.9481	0.903623	1.21916		0.0244459	0.00476947	0.00320522	0.000247788	326.107	25.8598	0.0592487	0.0127607	0	20.6277	1.59207	522.089	431.759
23JB15 - 14	151.994	98.7387	1.20541	1.61083		0.0218421	0.00428667	0.00321114	0.000184951	312.155	15.4981	0.0501883	0.0100806	0	20.6666	1.18847	10.1718	501.504
23JB15 - 28	527.237	716.537	6.83583	0.747983		0.0213111	0.00336192	0.00322791	0.000173254	311.575	16.9819	0.0470959	0.00666776		20.7747	1.11327	-190.113	416.989
23JB15 - 62	162.015	143.443	1.38325	1.12908		0.0232044	0.00420155	0.00322833	0.000199913	313.336	18.785	0.0576251	0.0117549	0	20.7768	1.28461	130.753	465.593
23JB15 - 68	425.582	416.217	4.0303	1.02345		0.0203065	0.00268352	0.00323482	0.000155162	311.159	15.0732	0.0461069	0.00613439	0	20.819	0.996997	-336.319	403.949
23JB15 - 35	188.748	161.82	1.67331	1.18446		0.0200667	0.00388774	0.00324169	0.000189433	313.849	17.8346	0.0434887	0.00826715	0	20.8628	1.21709	-249.683	521.656
23JB15 - 70	178.793	140.465	1.22478	1.30079		0.0197395	0.00412461	0.00325304	0.000173106	311.153	16.8032	0.0447619	0.00920084	0	20.9359	1.11228	-541.253	579.564
23JB15 - 74	411.689	658.503	6.53626	0.622543		0.0194389	0.00242876	0.00325334	0.000157656	309.678	15.0401	0.0439529	0.00541656	0	20.938	1.01299	-61.5806	245.242
23JB15 - 20	211.241	210.227	2.08392	1.04395		0.022282	0.00379709	0.00326709	0.000177075	310.43	17.7722	0.050338	0.00869944	0	21.0262	1.13781	31.3501	463.231
23JB15 - 47	147.413	140.883	1.43061	1.0465		0.0238668	0.0053901	0.00327694	0.000188565	306.933	16.472	0.0501192	0.0103172	0	21.0893	1.21159	-38.2799	436.432
23JB15 - 83	171.973	115.566	1.29775	1.50161		0.0227421	0.00435252	0.00327788	0.000177093	305.995	15.4391	0.0513913	0.00962815	0	21.0955	1.13794	-294.426	548.21
23JB15 - 61	148.634	154.679	1.48304	0.978204		0.0207525	0.00423731	0.00328635	0.00020242	306.945	16.8706	0.0451423	0.0091232	0	21.1496	1.30048	122.086	453.095
23JB15 - 43	168.167	137.841	1.23436	1.25392		0.0227601	0.00503409	0.00328636	0.000207696	307.393	18.5657	0.0513658	0.0115592	0	21.1496	1.3345	417.973	466
23JB15 - 45	124.844	78.8138	0.87141	1.59464		0.0245527	0.00616598	0.00329652	0.000189344	308.427	18.2373	0.055111	0.0136245	0	21.2151	1.21656	-211.603	683.749
23JB15 - 12	949.288	1543.58	15.3972	0.639269		0.0213649	0.00173625	0.00331838	0.000140897	301.854	12.4779	0.0467609	0.00341069	0	21.3561	0.905221	-23.1102	197.326
23JB15 - 18	131.166	122.784	1.33602	1.13201		0.0221272	0.00580957	0.00333833	0.000186072	300.976	15.7496	0.0445204	0.0111796	0	21.4838	1.19551	-91.8534	595.191
23JB15 - 29	244.557	141.906	1.51686	1.75079		0.025343	0.0045326	0.00333848	0.000162623	301.508	14.0113	0.0555163	0.00942601	0	21.4851	1.04474	103.943	420.783
23JB15 - 59	167.692	141.03	1.48316	1.19228		0.0245443	0.00452177	0.00335544	0.000203705	304.508	19.4796	0.0544867	0.010264	0	21.5935	1.30874	254.501	373.128
23JB15 - 86	75.1084	57.3375	0.50896	1.30221		0.0252911	0.00404485	0.00337868	0.000247471	299.269	21.4838	0.0570781	0.0103171	0	21.7422	1.58967	80.097	482.152
23JB15 - 2	191.584	252.067	2.22462	0.82448		0.0213323	0.00459281	0.00340779	0.000204393	295.979	17.9463	0.0465883	0.0100828	0	21.9299	1.31279	-175.829	505.484
23JB15 - 8	154.783	141.535	1.64033	1.16461		0.0226542	0.00561499	0.00346512	0.000201329	293.619	16.8818	0.0511079	0.013196	0	22.2982	1.29324	-374.198	596.664
23JB15 - 79	294.739	130.74	5.28	2.22735		0.0779139	0.00796829	0.00984373	0.000414027	101.275	4.63421	0.0572762	0.00514849	0	63.1455	2.64271	372.997	219.09
23JB15 - 16	282.941	243.083	7.59336	1.23239		0.0707912	0.006548	0.00987466	0.000417525	101.421	4.36722	0.0520892	0.0044429	0	63.3429	2.66537	195.884	239.594
23JB15 - 65	307.26	239.266	6.95577	1.28931		0.0668652	0.00638448	0.0100493	0.000435365	99.6982	4.2471	0.0496933	0.00474813	0	64.4569	2.77819	42.5834	211.032
23JB15 - 21	128.724	109.497	3.63033	1.27411		0.0684284	0.00915303	0.010224	0.00052362	98.8929	5.22724	0.0486134	0.00595396	0	65.5695	3.34132	-195.34	343.37
23JB15 - 41	491.131	331.016	10.3139	1.49009		0.0676383	0.00523418	0.0103272	0.000449521	97.03	4.38736	0.0466523	0.00265621	0	66.2306	2.8686	10.6354	147.376
23JB15 - 34	242.487	142.824	4.95251	1.76336		0.0782406	0.00766862	0.010332	0.000458093	97.0677	4.44103	0.0548478	0.00470413	0	66.2608	2.92317	340.744	179.506
23JB15 - 15	235.624	169.034	5.18816	1.44572		0.069358	0.00653098	0.0104978	0.000464668	95.5627	4.28553	0.0479182	0.00404669	0	67.3185	2.9643	-36.9309	225.256
23JB15 - 3	195.832	143.419	4.45322	1.44638		0.0655353	0.00797612	0.0106269	0.000483646	94.5622	4.25441	0.0434881	0.00457922	0	68.1417	3.0846	-222.677	266.16
23JB15 - 13	165.468	105.281	1.10757	1.64336		0.0284065	0.00556667	0.00326655	0.000203565	313.194	19.9119	0.0630195	0.0118432	0	21.0224	1.30789	424.418	411.333
23JB15 - 19	164.921	100.628	1.3792	1.7178		0.0252028	0.00418728	0.00371592	0.000226049	271.631	16.1604	0.0503995	0.00958269	0	23.909	1.45192	-242.861	442.482
23JB15 - 22	68.108	60.5697	3.18349	1.21737		0.20711	0.0313562	0.00467226	0.000405529	224.347	15.9434	0.321359	0.0418242	0	30.0449	2.59988	3462.08	216.897
23JB15 - 24	34.9714	21.1953	1.76984	1.68903		0.314391	0.156051	0.00543883	0.00097535	217.741	31.9767	0.293879	0.0747487	0	34.935	6.2272	2442.9	681.098
23JB15 - 26	95.2035	60.7152	0.925874	1.60635		0.047638	0.0107917	0.00335888	0.000232469	308.506	22.4786	0.101999	0.0217007	0	21.6152	1.49353	1333.15	413.197
23JB15 - 27	82.2174	58.7236	0.682751	1.44262		0.0321953	0.00850716	0.00336075	0.000206559	303.977	18.9209	0.0727366	0.0199929	0	21.6276	1.32701	657.211	619.499
23JB15 - 36	135.793	154.165	7.28054	0.900049		0.228581	0.0571876	0.00535624	0.000889624	201.923	24.9364	0.31668	0.0453971	0	34.4263	5.69571	3549.15	280.354
23JB15 - 37	2186.86	1383.69	58.7656	1.60337		0.102087	0.00886694	0.00850801	0.000376066	117.857	5.08143	0.0862867	0.00534111	0	54.6129	2.40345	1294.38	126.806
23JB15 - 30	106.154	88.9851	1.42246	1.2076		0.0376206	0.00905958	0.0034039	0.000215821	295.382	16.9189	0.0775157	0.0191834	0	21.9047	1.38673	683.123	594.515
23JB15 - 31	166.127	148.83	1.59081	1.14217		0.0385429	0.00903726	0.00323012	0.00020974	312.29	18.1475	0.0850174	0.0191579	0	20.7883	1.34765	779.471	541.341
23JB15 - 32	184.501	200.004	2.19789	1.00513		0.0382395	0.00691106	0.00336624	0.000174609	300.469	16.8208	0.0805297	0.0129582	0	21.6633	1.1219	889.382	436.155
23JB15 - 33	128.462	103.913	1.31373	1.28419		0.0393581	0.00633209	0.00339544	0.000183213	293.212	16.3718	0.0854212	0.0136683	0	21.8508	1.17715	1194.65	329.454
23JB15 - 39	102.152	74.5861	1.82264	1.38493		0.0740554	0.0186811	0.00357696	0.000258878	288.964	19.4308	0.146189	0.0333495	0	23.0159	1.66255	2302.4	371.505
23JB15 - 4	75.9835	62.6342	2.40846	1.27168		0.140543	0.0186293	0.00427322	0.000318478	239.846	17.1906	0.241992	0.0255666	0	27.4858	2.04406	3155.86	185.395
23JB15 - 40	207.277	175.456	3.3333	1.19429		0.0697854	0.0191059	0.00366625	0.000232135	279.557	18.3449	0.129182	0.0316365	0	23.5898	1.4909	1495.28	483.458
23JB15 - 42	140.988	88.1371	1.14372	1.62275		0.039106	0.00550271	0.00347231	0.000214814	294.342	18.6908	0.082927	0.0117184	0	22.3442	1.37988	1067.8	282.111
23JB15 - 44	70.5563	36.7514	0.339549	1.9343		0.0273359	0.00808815	0.00335658	0.000218999	301.874	19.3376	0.060785	0.0183002	0	21.6006	1.4071	1263.14	423.645
23JB15 - 48	340.068	409.344	5.38931	0.837214		0.0441546	0.00574686	0.00338057	0.000181652	299.57	16.9808	0.103611	0.0164259	0	21.7552	1.16706	1471.92	321.035
23JB15 - 5	230.923	319.383	3.52436	0.762389		0.0277233	0.00511725	0.00326231	0.000178693	310.5	15.8778	0.0618375	0.0104227	0	20.9955	1.14801	420.078	453.784
23JB15 - 51	116.626	112.632	2.95825	1.0402		0.126806	0.0308542	0.00379803	0.000277656	268.516	21.4767	0.225566	0.0463733	0	24.4356	1.78279	2589.76	392.907
23JB15 - 52	137.93	115.49	1.01848	1.19605		0.0259737	0.00495924	0.00314937	0.000185601	323.317	19.3917	0.0600822	0.0103447	0	20.2696	1.19265	283.144	505.482
23JB15 - 53	222.255	226.774	2.95114	1.06473		0.0333273	0.00576007	0.00325696	0.000171861	307.274	14.6674	0.0749725	0.0124405	0	20.9612	1.10429	790.301	474.161
23JB15 - 55	680.258	984.501	10.6503	0.704239		0.0305416	0.00357382	0.00341502	0.000158341	292.371	12.3423	0.0647715	0.00653032	0	21.9769	1.01726	658.178	212.038
23JB15 - 57	246.427	272.339	3.33981	0.934235		0.0355468	0.00597297	0.00332505	0.000173182	304.442	17.4192	0.0773851	0.0128079	0	21.3986	1.11283	954.717	312.37
23JB15 - 58	21.4625	13.3263	2.64107	1.74048		0.660348	0.0984301	0.00910515	0.000818028	118.157	11.6171	0.538139	0.0694188	0	58.4113	5.22302	4091.75	174.329
23JB15 - 60	114.946	110.469	4.62211	1.05718		0.095391	0.0196051	0.00437121	0.000441364	240.287	19.868	0.148356	0.0231149	0	28.1117	2.82966	2114.44	282.15
23JB15 - 63	62.6804	47.0819	0.645184	1.38831		0.03145	0.00859872	0.00336063	0.000281876	311.963	22.5463	0.0705851	0.0197929	0	21.6255	1.81005	631.429	574.363
23JB15 - 64	190.654	172.304	2.70822	1.10831		0.0439451	0.00836148	0.0033655	0.000188512	295.825	16.5649	0.0924577	0.0158662	0	21.6583	1.21111	1086.12	354.191
23JB15 - 66	153.363	151.623	2.3953	1.03754		0.0542286	0.00884453	0.00340895	0.000182254	291.928	19.7431	0.117575	0.0178705	0	21.9376	1.17094	1799.86	252.217
23JB15 - 67	94.0642	80.4813	1.10154	1.23147		0.0408147	0.00998955	0.00348045	0.000274277	293.061	20.8309	0.0854328	0.0180626	0	22.3957	1.76208	890.94	557.179
23JB15 - 69	140.27	132.09	3.14574	1.05578		0.106759	0.0250494	0.00390704	0.000329341	269.751	20.8534	0.185728	0.0371189	0	25.1344	2.11417	2053.97	518.839
23JB15 - 7	161.928	131.563	1.59315	1.27895		0.0246917	0.00520565	0.00313683	0.000180319	317.567	17.7499	0.0582694	0.0128308	0	20.189	1.15872	243.585	564.515
23JB15 - 71	281.374	375.43	5.78352	0.787772		0.0585782	0.0128532	0.00374334	0.000215455	271.427	14.6661	0.105679	0.0176581	0	24.0852	1.3834	1446.1	344.317
23JB15 - 72	78.4313	58.5105	2.09046	1.33559		0.136999	0.028154	0.00401301	0.00032883	261.42	20.3758	0.234365	0.0415319	0	25.815	2.11043	2874.14	264.689
23JB15 - 73	264.161	160	10.6763	1.69492		0.183226	0.0246863	0.0127175	0.00101587	81.3254	7.10752	0.100948	0.00786267	0	81.4409	6.46931	1598.83	163.567
23JB15 - 75	466.344	282.555	3.90231	1.27431		0.0319063	0.00549961	0.00398197	0.000398987	271.756	24.8289	0.0590528	0.0106157	0	25.614	2.5609	322.899	377.756
23JB15 - 76	121.515	82.7137	0.898024	1.48663		0.025241	0.00487481	0.0032248	0.000190858	316.274	19.3446	0.058519	0.011377	0	20.7542	1.22638	107.178	504.81
23JB15 - 77	75.0613	47.6762	1.55078	1.5555		0.161247	0.0427381	0.00450994	0.000473054	242.633	24.5231	0.234397	0.0516253	0	29.0014	3.03461	2459.05	474.47
23JB15 - 78	214.475	133.731	1.41017	1.71122		0.0259223	0.00390356	0.00328479	0.000176932	308.476	16.9377	0.0573962	0.00814024	0	21.1399	1.13682	415.873	306.147
23JB15 - 80	137.31	126.438	1.9344	1.10211		0.0456316	0.00731095	0.00389956	0.000256496	262.855	16.0908	0.0874728	0.0152694	0	25.0879	1.64662	1054.17	364.269
23JB15 - 81	134.531	140.716	1.66414	1.04507		0.0289417	0.00640385	0.00345576	0.00023528	300.293	23.4907	0.0644253	0.0139293	0	22.2376	1.5116	554.324	487.384
23JB15 - 84	135.84	111.836	3.15214	1.2133		0.10008	0.0130967	0.00393751	0.000247421	259.781	15.5627	0.186101	0.0200961	0	25.3317	1.58846	2606.74	226.977
23JB15 - 85	217.501	232.174	3.37591	0.946779		0.0516862	0.0107397	0.00359781	0.000233198	284.009	16.1012	0.102015	0.0164472	0	23.1502	1.49737	1479.67	355.814
23JB15 - 87	134.947	119.53	1.68396	1.12841		0.0441334	0.00794572	0.00342592	0.000198018	293.059	14.7905	0.0958515	0.0177051	0	22.0465	1.27212	1091.08	404.583
23JB15 - 88	220.542	236.086	2.35577	0.939966		0.0343518	0.00560598	0.00325653	0.000174516	308.005	15.7499	0.0781019	0.0128587	0	20.9583	1.12141	773.44	360.063
23JB15 - 89	217.539	214.151	2.54672	1.01348		0.033508	0.00510516	0.00344382	0.000191721	294.867	16.1527	0.0752541	0.012106	0	22.1615	1.23157	870.148	310.087
23JB15 - 9	160.429	115.099	5.74509	1.45315		0.140979	0.0677739	0.00455711	0.000633857	241.713	23.2473	0.199808	0.0666253	0	29.2985	4.06023	1837.04	638.245
23JB15 - 91	94.833	62.1869	2.61267	1.54375		0.126424	0.0415463	0.0042634	0.000512237	248.279	21.1722	0.196353	0.0297337	0	27.4172	3.27841	2706.95	232.159
23JB15 - 92	174.843	171.034	2.82994	1.06189		0.0947667	0.0281316	0.00386966	0.000307763	269.92	19.545	0.160805	0.042632	0	24.8949	1.97558	1555.12	608.637
23JB15 - 10	93.4522	98.2817	2.20636	1.13649		0.138478	0.0309332	0.00438142	0.000352539	238.67	17.9917	0.217954	0.0438505	0	28.1797	2.26176	2520.88	435.759
23JB15 - 11	74.3235	72.0688	1.53669	1.06778		0.093543	0.023277	0.00400208	0.000284499	253.753	18.449	0.158852	0.0302163	0	25.7458	1.82603	2175.53	421.675
23JB15 - 54	239.49	347.007	4.05941	0.697567		0.0390404	0.00634685	0.00335737	0.00016982	300.465	16.0174	0.0844902	0.0127807	0	21.6063	1.09113	1046.27	337.277
23JB15 - 50	572.722	998.716	9.6348	0.578901		0.023221	0.00250591	0.00312251	0.000145565	321.718	14.4504	0.054088	0.00539569	0	20.0974	0.935364	272.298	221.95
23JB15 - 25	194.536	206.222	1.79774	1.00846		0.025436	0.00458628	0.00320691	0.000184807	313.061	15.8503	0.0560976	0.00957907	0	20.6394	1.18753	150.425	497.204
23JB15 - 1	503.703	862.707	7.36125	0.632156		0.0244405	0.00259827	0.00321911	0.000151896	312.746	15.1267	0.0553035	0.00568132	0	20.7181	0.97604	277.405	275.37
23JB15 - 6	79.126	62.0078	0.733625	1.40343		0.0246515	0.0087533	0.00371545	0.000287344	276.534	20.3505	0.046517	0.0157144	0	23.905	1.84531	625.934	471.309
Black data corresponds to concordant young zircons
Blue data corresponds to concordant old zircons
Gray italic data corresponds to discordant zircons
