# Supplementary figures and images for: Neogene plant macrofossils from West Antarctica reveal persistence of Nothofagaceae forests into the Early Miocene
Source: Research Square preprint supplement (doi:10.21203/rs.3.rs-6148923/v1), 2025-04-26

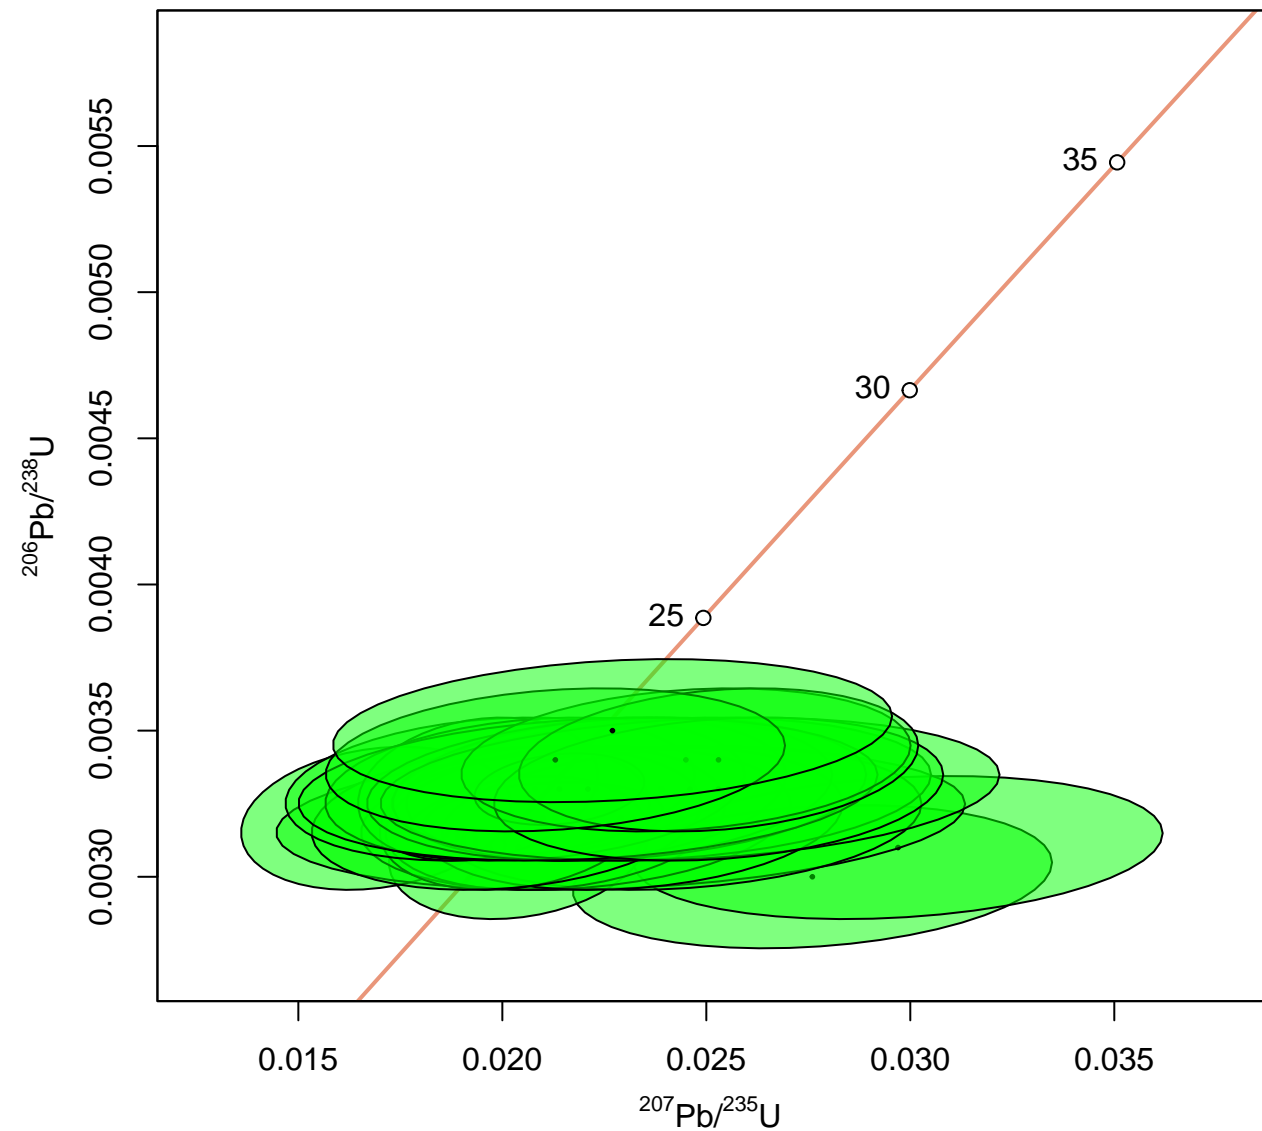

Supplement: Supplementary file 1 [file Concordia_23JB15.pdf › Concordia_23JB15.pdf]

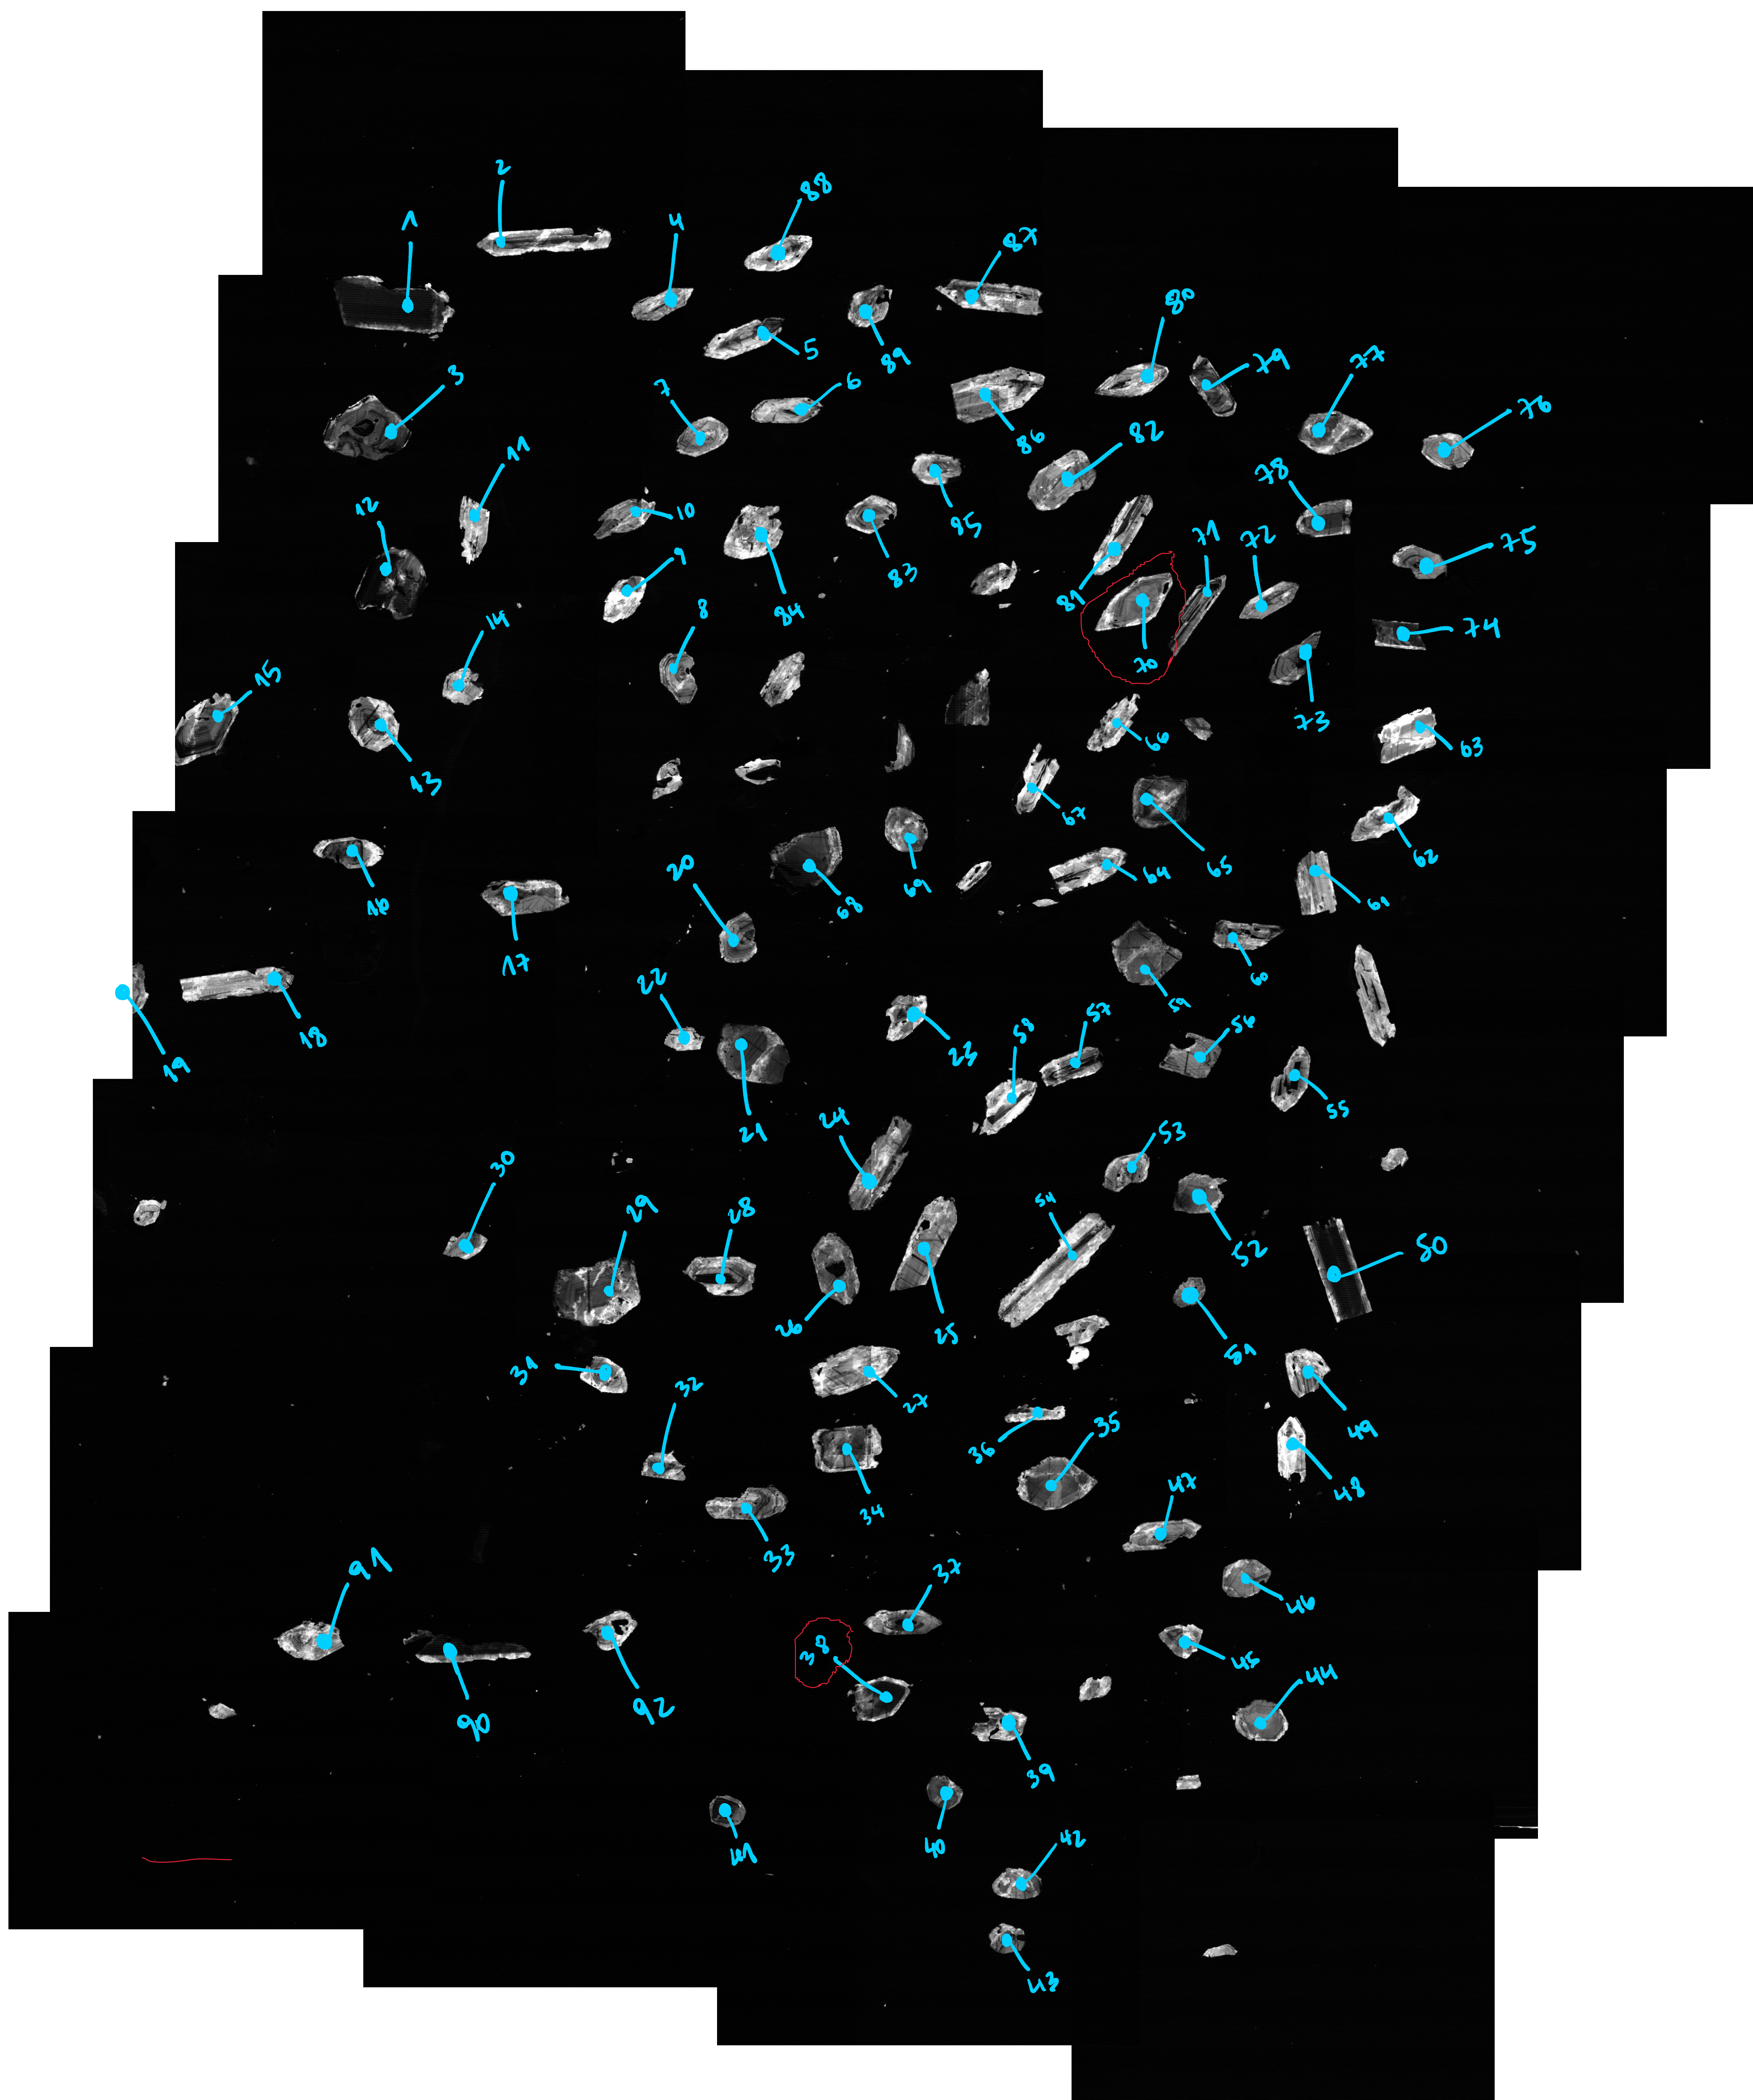

Supplement: Supplementary file 2 [file Points_Mozaic_23JB15.pdf › Points_Mozaic_23JB15.pdf]

mean =  $20.97 \pm 0.22$  Ma (27/27)

MSWD = 1.2,  $p(\chi^2) = 0.24$

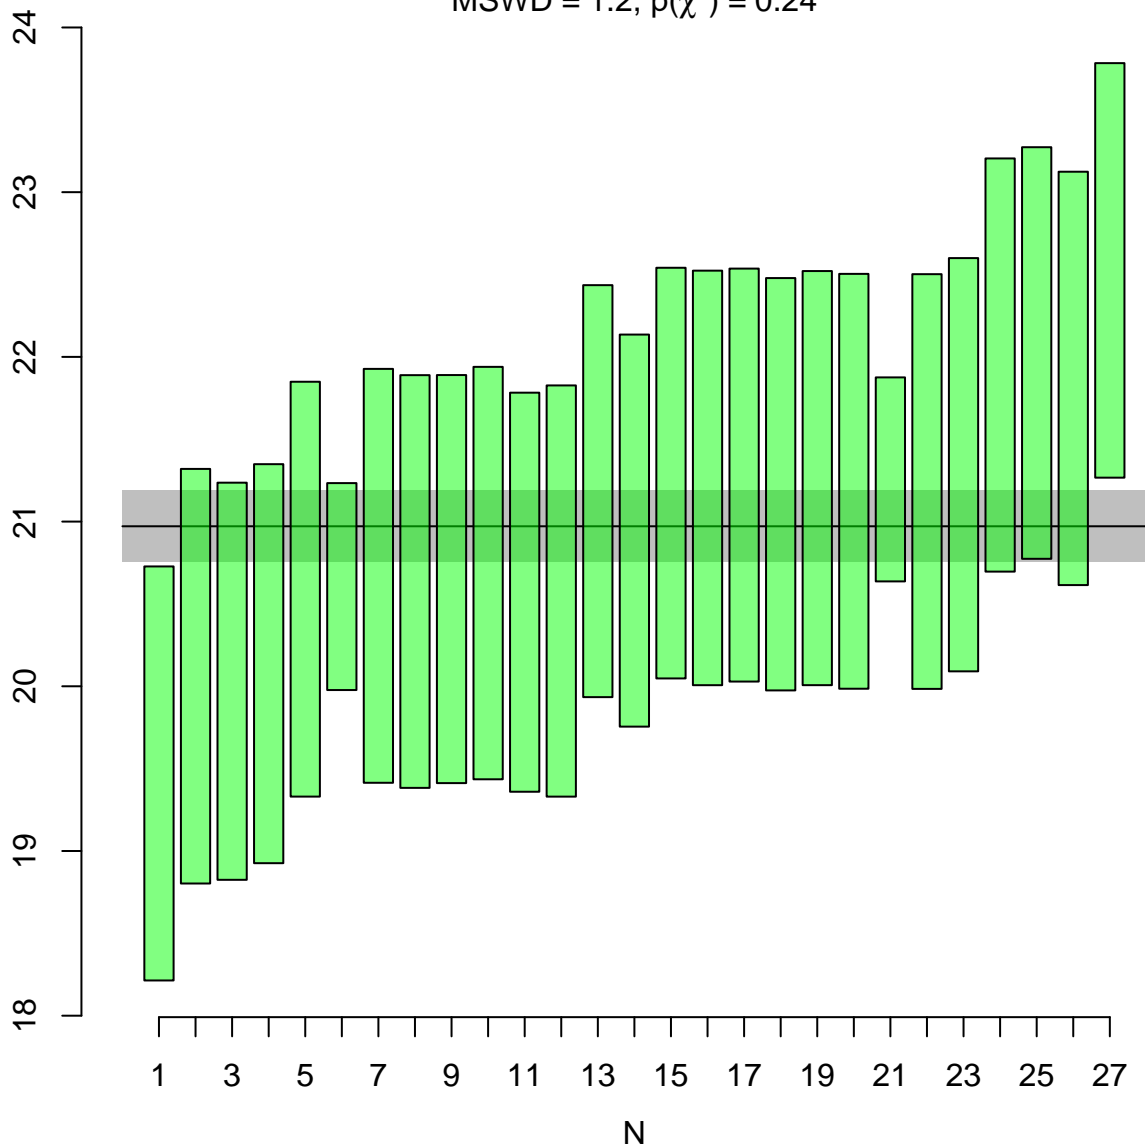

Supplement: Supplementary file 3 [file WAM_23JB15.pdf › WAM_23JB15.pdf]
